# Supplementary material for: A study on DNA methylation modifying natural compounds identified EGCG for induction of IFI16 gene expression related to the innate immune response in cancer cells
Source: PubMed Central journal article supplement — Oncol Lett. 2022 May 19;24(1):218. doi: 10.3892/ol.2022.13339 (PMC9178671; doi:10.3892/ol.2022.13339), 2022-05-19

Figure S1. Association between IFI16 and DNMT expression. (A) Inverse correlation of IFI16 and DNMTs expression. (B) Immune responsiveness of IFI16. IFI, IFN-induced protein; DNMT, DNA methyltransferase.

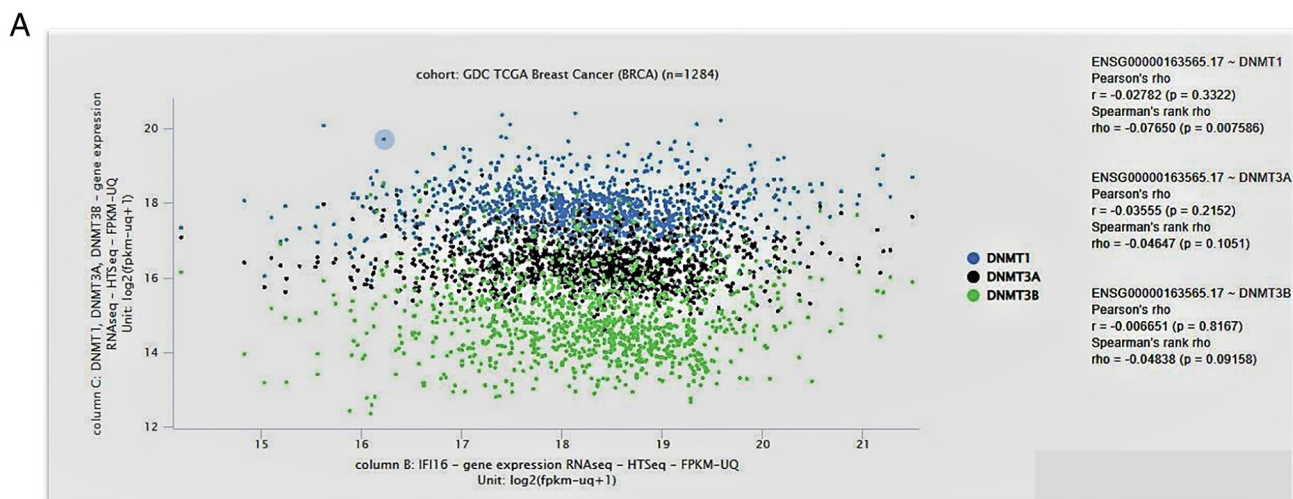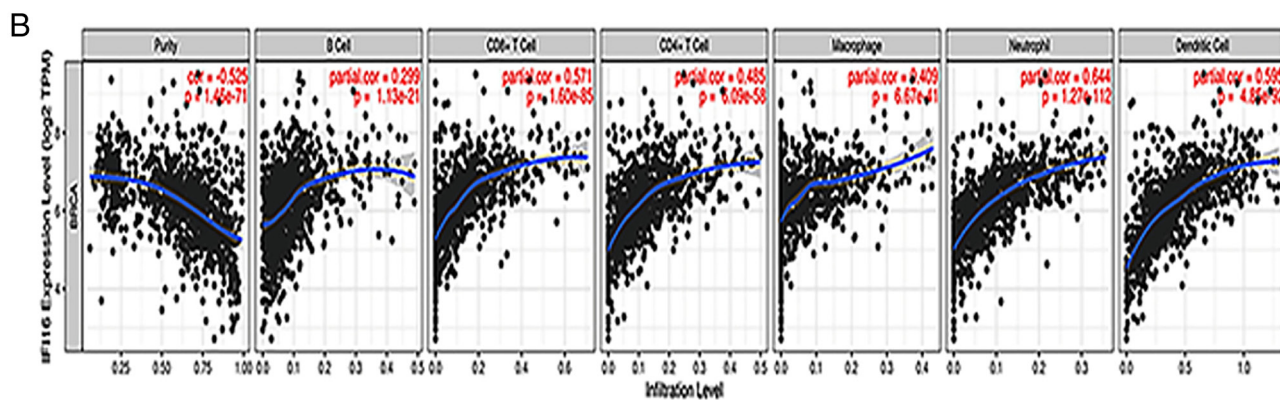

Figure S2. Interactions of amino acids residues (DNMT1\_A) with (A) SAM, (B) EGCG, (C) 5-aza-dc, (D) vitamin C and (E) SAH. DNMT, DNA methyltransferase; SAH, S-adenosyl homocysteine; 5-aza-dc, 5-Azacytadine; EGCG, Epigallocatechin gallate; SAM, S-adenosyl methionine.

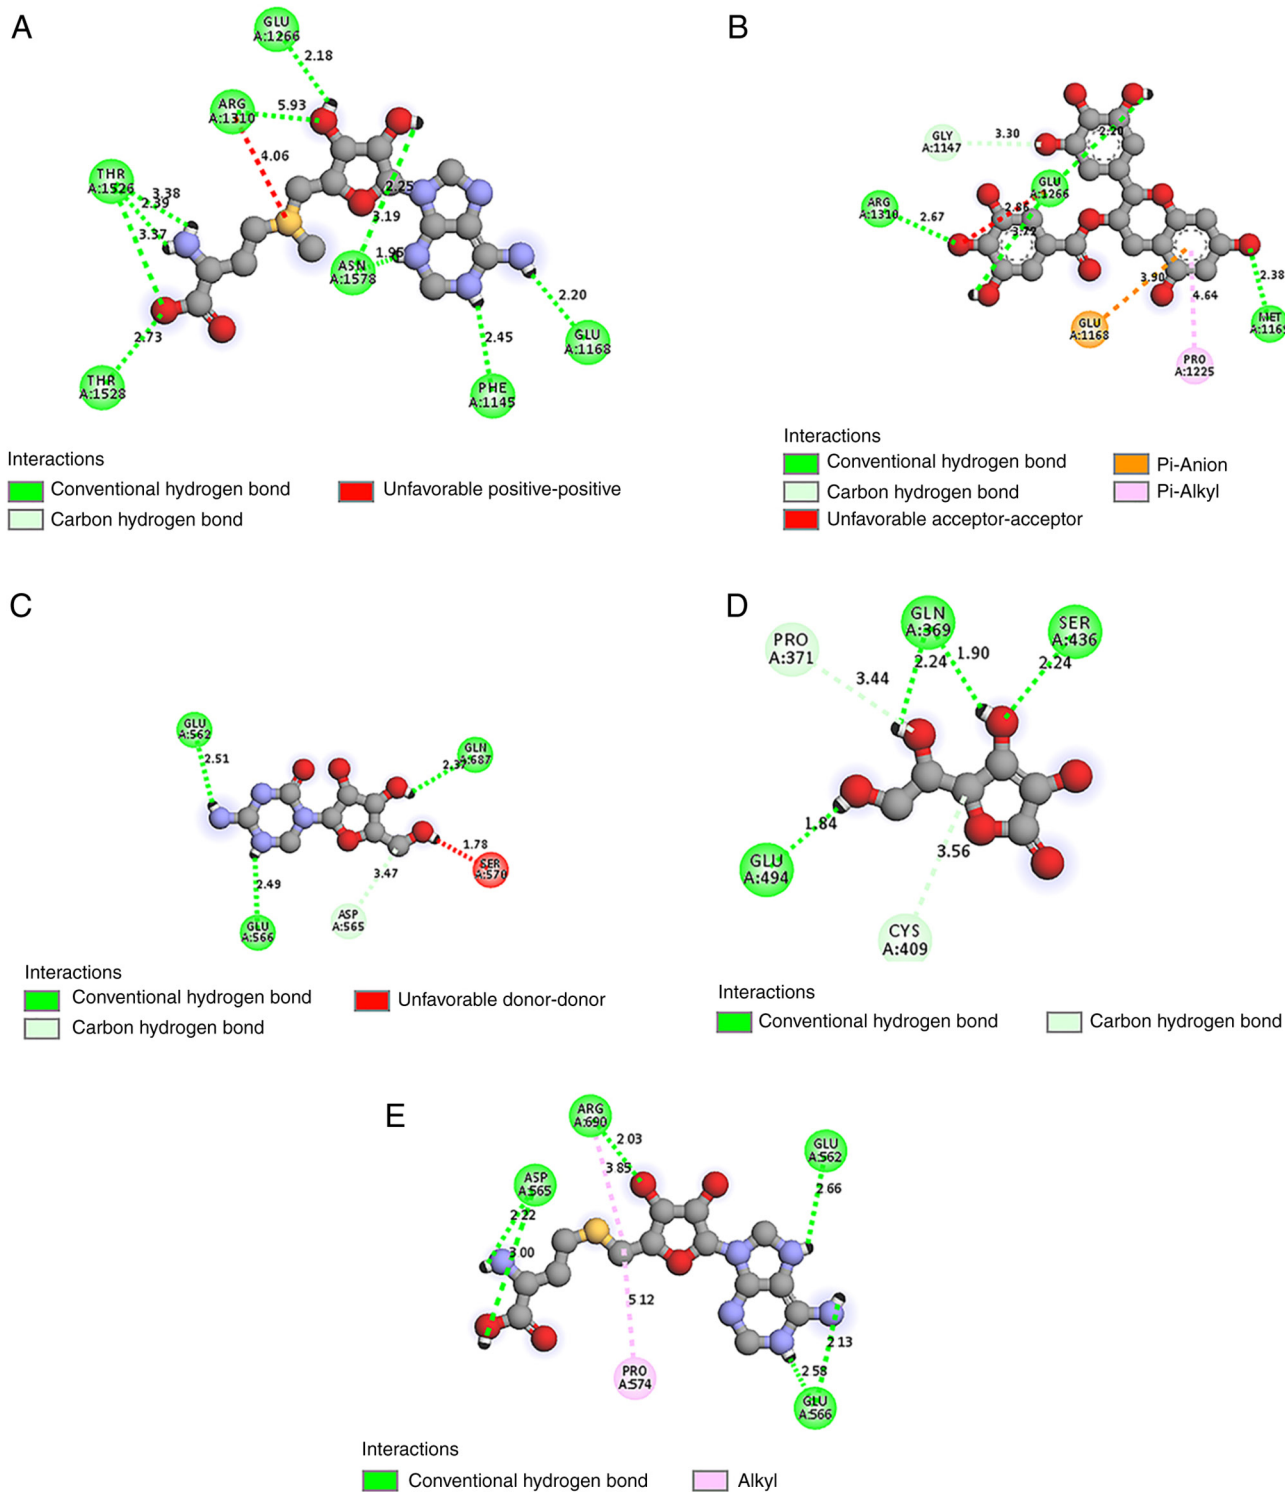

Figure S3. Interactions of amino acids residues (DNMT1-B) with (A) 5-aza-dc, (B) SAM, (C) EGCG, (D) SAH and (E) vitamin C. DNMT, DNA methyltransferase; SAH, S-adenosyl homocysteine; 5-aza-dc, 5-Azacytadine; EGCG, Epigallocatechin gallate; SAM, S-adenosyl methionine.

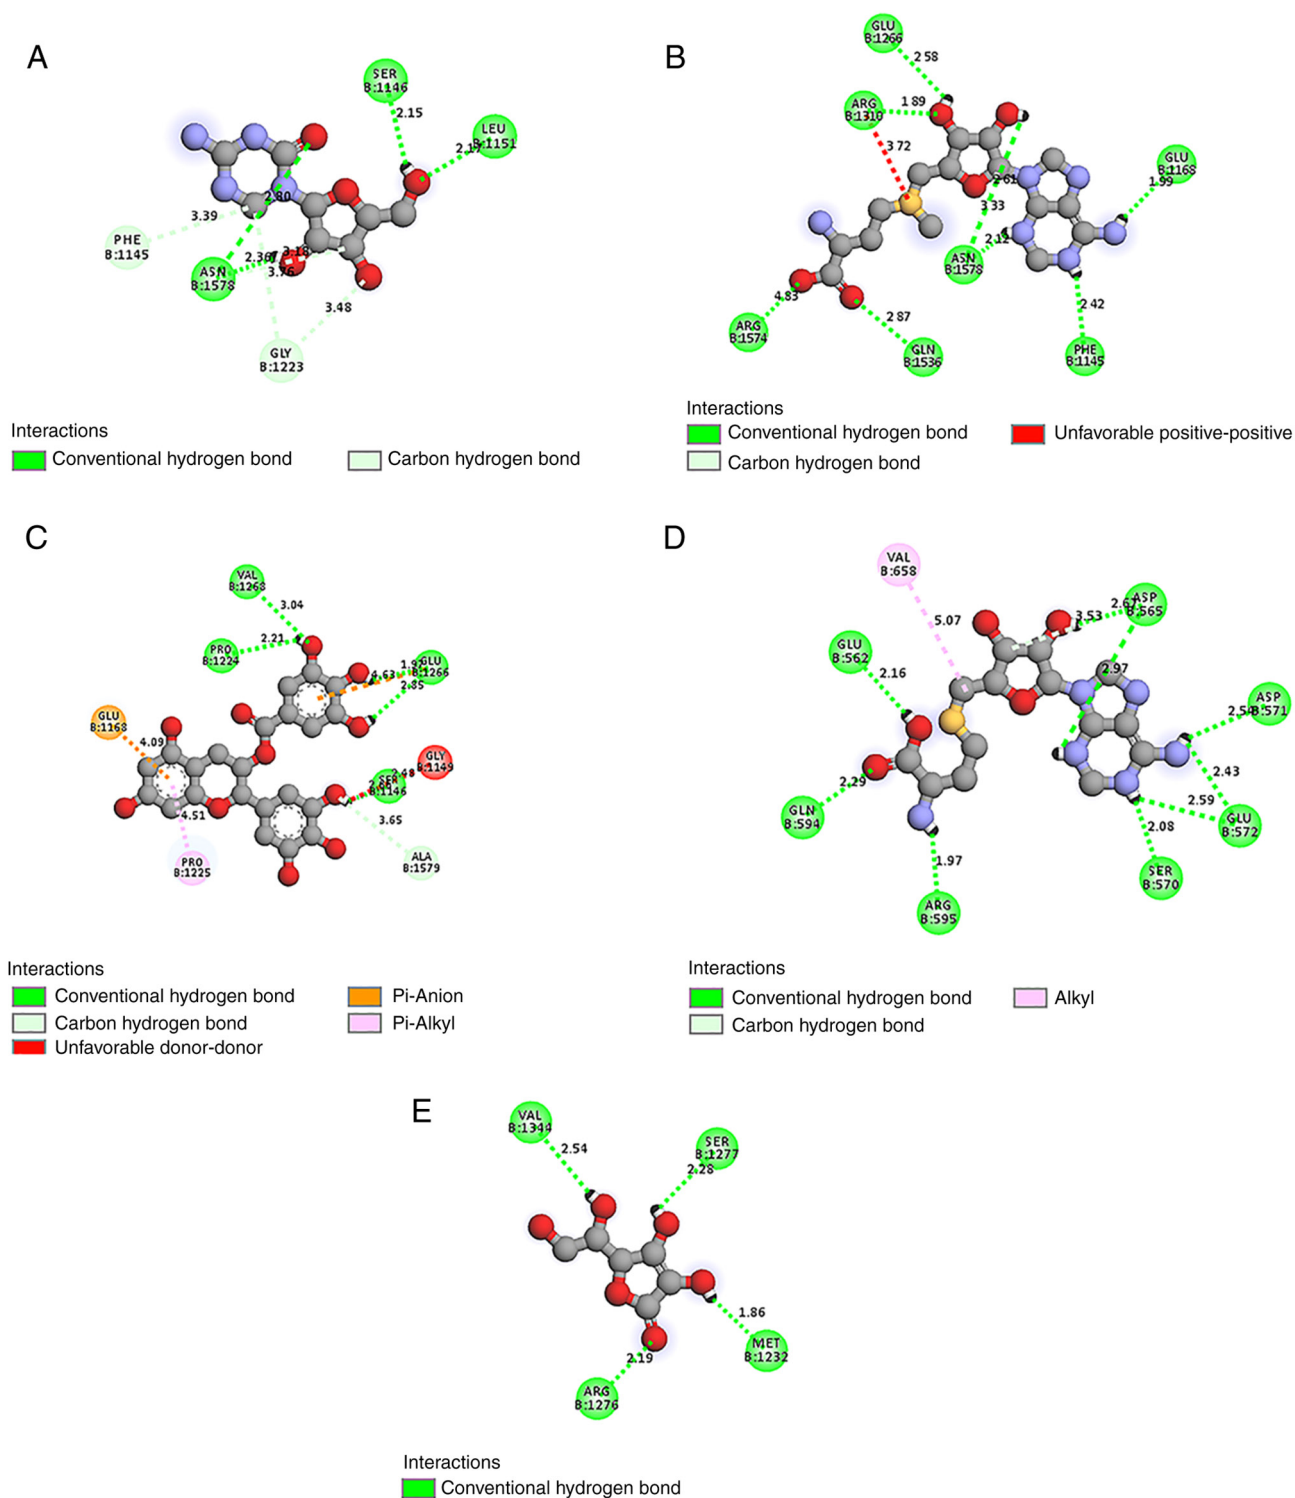

Figure S4. Interactions of amino acids residues (DNMT1\_A) with (A) SAM, (B) SAH, (C) EGCG, (D) vitamin C and (E) 5-aza-dc. DNMT, DNA methyltransferase; SAH, S-adenosyl homocysteine; 5-aza-dc, 5-Azacytadine; EGCG, Epigallocatechin gallate; SAM, S-adenosyl methionine.

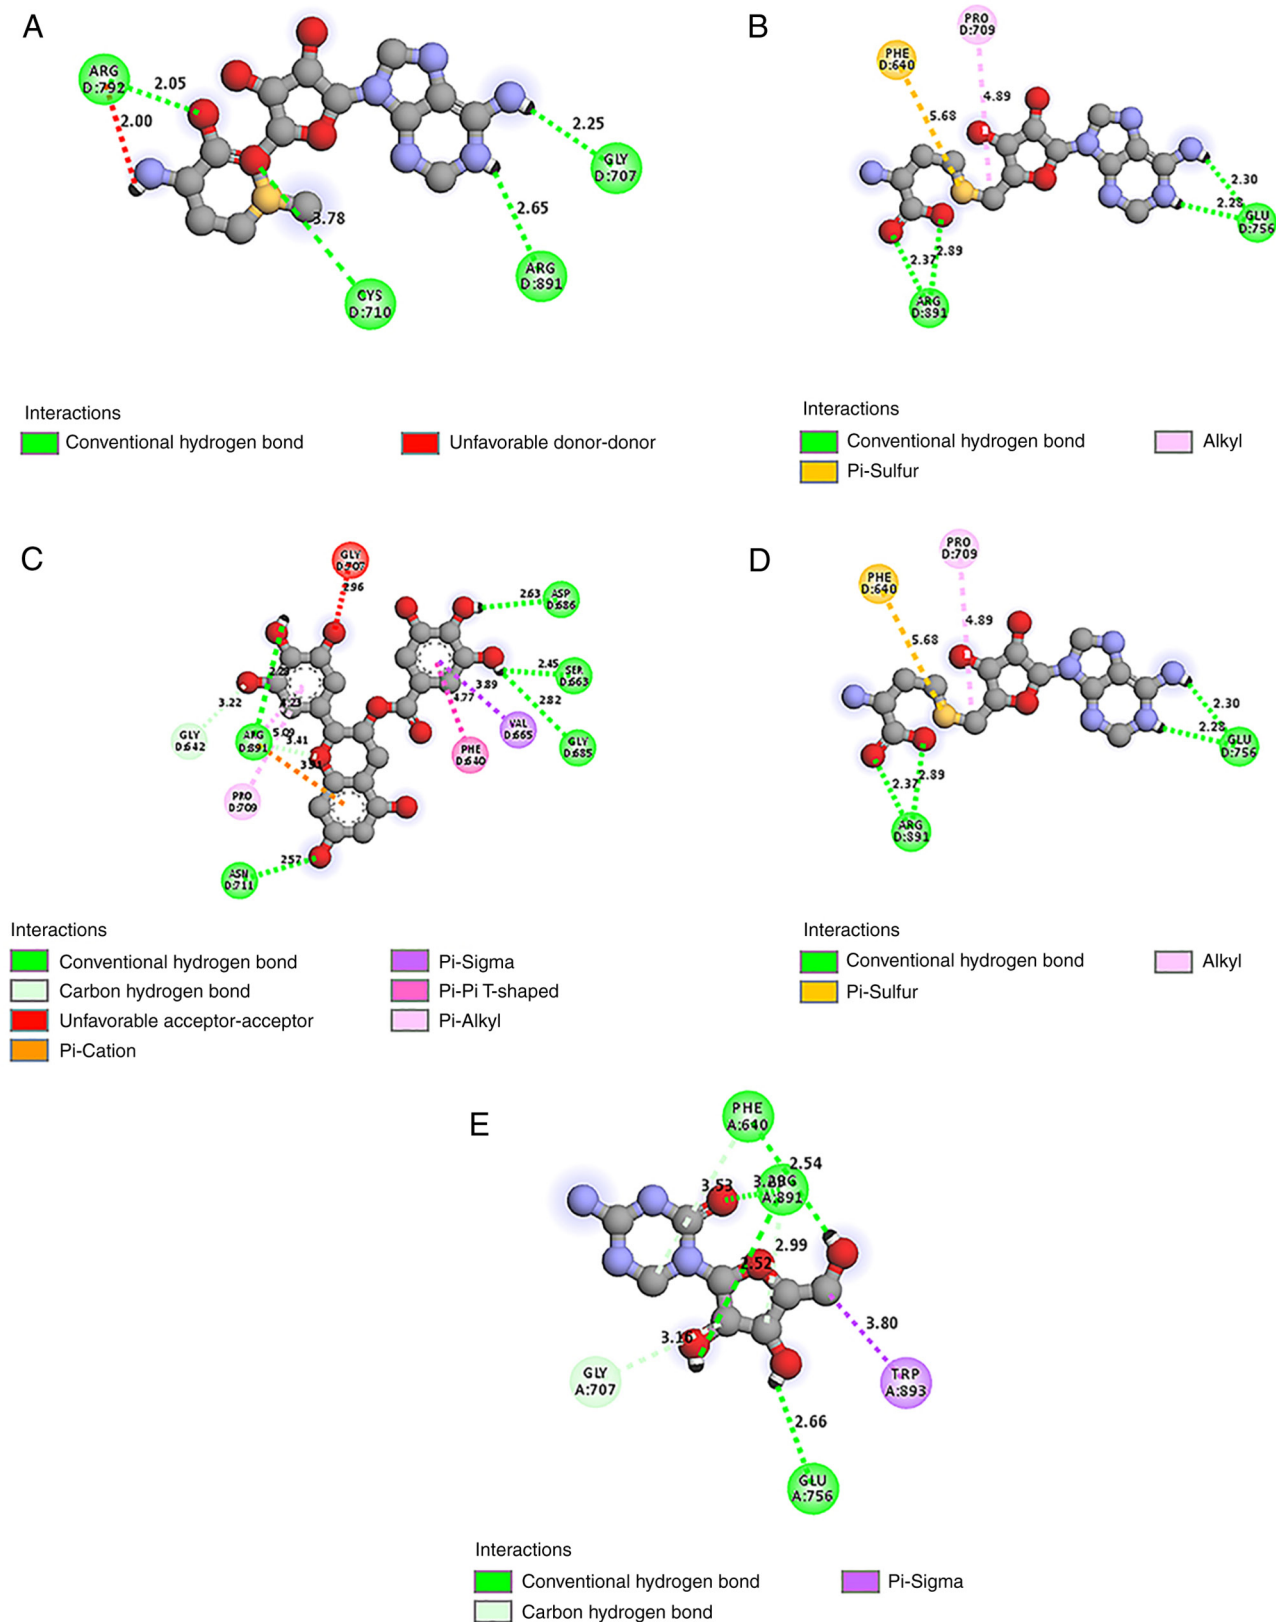

Figure S5. Interactions of amino acids residues (DNMT1\_A) with (A) 5-aza-dc, (B) SAM, (C) SAH, (D) EGCG and (E) vitamin C. DNMT, DNA methyltransferase; SAH, S-adenosyl homocysteine; 5-aza-dc, 5-Azacytadine; EGCG, Epigallocatechin gallate; SAM, S-adenosyl methionine.

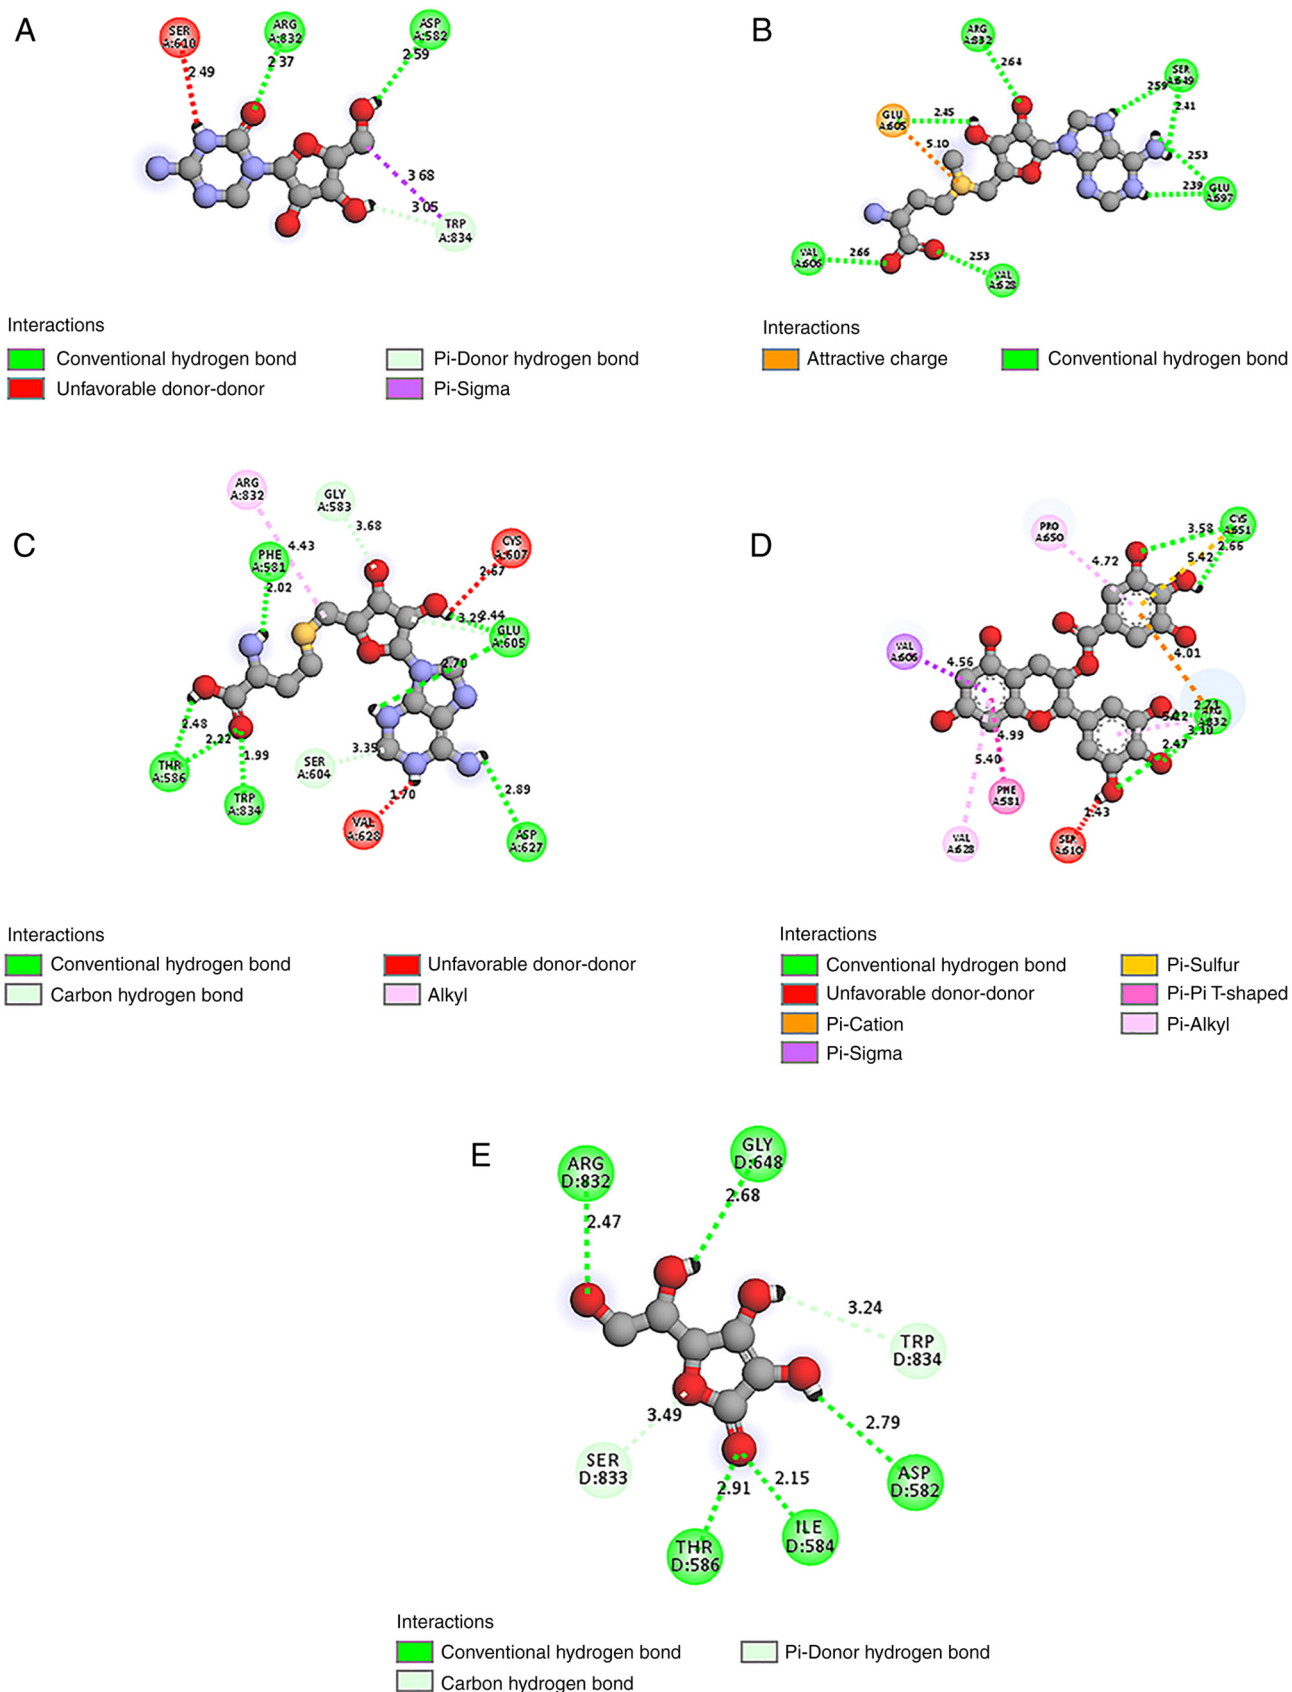

Supplement: Supplementary_Data.pdf [file Supplementary_Data.pdf]
